# Supplementary material for: Uneven distribution of enamel, dentine and cementum in cheek teeth of domestic horses (Equus caballus): A micro computed tomography study
Source: PLoS One. 2017 Aug 16;12(8):e0183220. doi: 10.1371/journal.pone.0183220 (PMC5558931; doi:10.1371/journal.pone.0183220)
Supplement: S1 File — Measured area in mm² of the different substances for UCT and LCT used in this study. Each variable was taken at a specific level along the tooth axis. Furthermore for each level peripheral cementum was assigned to an extra- or intra-alveolar position. (XLSX) [file pone.0183220.s003.xlsx]

## Sheet: legend
zahnid	individual tooth number
stat	intraalveolar positon of selected slide =1, mid alveolar positon of selected slide =2, extralveolar positon of selected slide =3
zp	tooth position according to modified Triadan
za	age of tooth post eruption in years
lok	horizontal slide levels, apical = 0 mm, every 10 mm up to 99( most occlusal slide)							slice of upper cheek teeth with different selected areas /substances										slice of lower cheek teeth with different selected areas /substances
pS	peripheral enamel in mm²
pz	peripheral cementum in mm²
isd	infundibular enamel distal in mm²
izd	cementum/area of distal infundibulum in mm²
ism	infundibular enamel mesial in mm²
izm	cementum/area of mesial infundibulum in mm²
id	dentine in mm²
ges	total area, sum of all indiviudual areas in mm²
s_ges	total enamel, sum of peripheral enamel and infundibular enamel( ps + isd+ izd)
infun	infundibula, sum of infundibular enamel and infundibular cementum ( isd + ism + izm + izd)
*	no availiable subtance/area could be chosen on selected slide
								localisation of selected slide in mm along tooth axis

## Sheet: lower cheek teeth
zahnid	stat	zp	za	kr	lok	ps	pz	id	ges
668	1	407	5	0	0	97.0072	17.1664	220.87	335.044
668	1	407	5	10	10	116.043	54.303	190.377	360.722
668	1	407	5	20	20	141.473	72.8142	184.628	398.915
668	1	407	5	30	30	122.794	115.088	211.315	449.197
668	1	407	5	40	40	128.556	137.654	204.437	470.646
668	2	407	5	50	50	127.272	248.405	201.902	577.578
668	3	407	5	60	60	*	*	*	*
668	3	407	5	70	70	*	*	*	*
668	3	407	5	59.53	99	122.693	189.644	207.765	520.101
675	1	409	15	0	0	72.1956	17.516	212.31	302.022
675	1	409	15	10	10	107.107	42.9126	157.873	307.892
675	1	409	15	20	20	102.77	103.529	152.05	358.349
675	2	409	15	30	30	110.536	143.705	156.562	410.803
675	3	409	15	40	40	112.304	*	157.516	*
675	3	409	15	50	50	*	*	*	*
675	3	409	15	60	60	*	*	*	*
675	3	409	15	70	70	*	*	*	*
675	3	409	15	45.68	99	101.196	154.41	161.201	416.807
678	1	407	10	0	0	98.8697	92.9996	196.939	388.809
678	2	407	10	10	10	133.229	183.35	174.898	491.477
678	3	407	10	20	20	121.14	232.408	178.919	532.467
678	3	407	10	30	30	*	*	*	*
678	3	407	10	40	40	*	*	*	*
678	3	407	10	50	50	*	*	*	*
678	3	407	10	60	60	*	*	*	*
678	3	407	10	70	70	*	*	*	*
678	3	407	10	24.85	99	123.365	204.8	178.327	506.492
684	1	407	8	0	0	134.11	123.601	203.421	461.132
684	1	407	8	10	10	161.598	129.84	200.046	491.484
684	2	407	8	20	20	156.03	231.064	218.55	605.644
684	3	407	8	30	30	147.585	279.638	222.954	650.177
684	3	407	8	40	40	*	*	*	*
684	3	407	8	50	50	*	*	*	*
684	3	407	8	60	60	*	*	*	*
684	3	407	8	70	70	*	*	*	*
684	3	407	8	39.94	99	144.492	210.313	214.778	569.583
688	1	407	11	0	0	90.7471	97.6997	232.012	420.459
688	2	407	11	10	10	138.185	208.982	172.303	519.469
688	3	407	11	20	20	136.578	196.596	178.011	511.185
688	3	407	11	30	30	*	*	*	*
688	3	407	11	40	40	*	*	*	*
688	3	407	11	50	50	*	*	*	*
688	3	407	11	60	60	*	*	*	*
688	3	407	11	70	70	*	*	*	*
688	3	407	11	21.57	99	128.724	155.956	181.528	466.209
691	1	409	16	0	0	88.0844	29.1216	196.395	313.601
691	1	409	16	10	10	118.954	91.0161	176.404	386.375
691	2	409	16	20	20	122.209	181.844	171.872	475.925
691	3	409	16	30	30	121.409	220.13	179.087	520.626
691	3	409	16	40	40	*	*	*	*
691	3	409	16	50	50	*	*	*	*
691	3	409	16	60	60	*	*	*	*
691	3	409	16	70	70	*	*	*	*
691	3	409	16	37.88	99	110.085	164.684	175.725	450.495
694	1	407	14	0	0	82.4161	45.2727	223.284	350.973
694	1	407	14	10	10	109.931	129.437	229.04	468.407
694	2	407	14	20	20	136.262	241.956	192.199	570.417
694	3	407	14	30	30	130.95	239.966	218.295	589.211
694	3	407	14	40	40	*	*	*	*
694	3	407	14	50	50	*	*	*	*
694	3	407	14	60	60	*	*	*	*
694	3	407	14	70	70	*	*	*	*
694	3	407	14	31.82	99	135.24	184.917	225.12	545.276
938	1	308	11	0	0	84.7426	74.3607	191.237	350.341
938	2	308	11	10	10	121.153	174.797	165.969	461.919
938	3	308	11	20	20	134.413	292.541	159.554	586.508
938	3	308	11	30	30	*	*	*	*
938	3	308	11	40	40	*	*	*	*
938	3	308	11	50	50	*	*	*	*
938	3	308	11	60	60	*	*	*	*
938	3	308	11	70	70	*	*	*	*
938	3	308	11	27.06	99	116.123	257.61	176.908	550.642
939	1	407	12	0	0	86.1143	75.9072	197.464	359.485
939	2	407	12	10	10	141.231	205.378	163.649	510.257
939	3	407	12	20	20	130.197	265.726	173.701	569.624
939	3	407	12	30	30	*	*	*	*
939	3	407	12	40	40	*	*	*	*
939	3	407	12	50	50	*	*	*	*
939	3	407	12	60	60	*	*	*	*
939	3	407	12	70	70	*	*	*	*
939	3	407	12	24.68	99	119.391	179.06	185.367	483.819
942	1	309	4.5	0	0	85.1124	18.2489	204.853	308.215
942	1	309	4.5	10	10	120.508	37.0694	168.813	326.39
942	1	309	4.5	20	20	127.675	42.7377	168.019	338.432
942	1	309	4.5	30	30	104.868	67.1593	177.117	349.144
942	1	309	4.5	40	40	104.753	80.9906	169.075	354.819
942	2	309	4.5	50	50	105.896	118.188	160.724	384.808
942	3	309	4.5	60	60	125.275	247.631	147.746	520.653
942	3	309	4.5	70	70	*	*	*	*
942	3	309	4.5	67.16	99	127.581	154.618	144.257	426.456
943	1	410	3.5	0	0	80.251	18.1481	182.294	280.693
943	1	410	3.5	10	10	118.652	32.4366	155.129	306.218
943	1	410	3.5	20	20	112.412	40.6466	158.807	311.866
943	1	410	3.5	30	30	115.693	51.9429	164.792	332.428
943	1	410	3.5	40	40	137.062	55.7554	152.211	345.029
943	1	410	3.5	50	50	121.14	65.8549	150.483	337.478
943	3	410	3.5	60	60	124.468	187.001	152.588	464.057
943	3	410	3.5	70	70	*	*	*	*
943	3	410	3.5	69.27	99	144.734	131.333	137.56	413.627
998	1	408	1.5	0	0	101.164	16.267	213.226	330.658
998	1	408	1.5	10	10	121.588	46.5334	194.391	362.513
998	1	408	1.5	20	20	135.176	54.5249	196.874	386.574
998	1	408	1.5	30	30	140.128	71.1164	201.295	412.539
998	1	408	1.5	40	40	142.866	78.2505	201.592	422.709
998	1	408	1.5	50	50	126.531	110.953	213.203	450.686
998	2	408	1.5	60	60	130.973	191.676	207.039	529.688
998	3	408	1.5	70	70	132.774	253.177	193.949	579.9
998	3	408	1.5	75.77	99	122.943	182.177	180.003	485.123
1002	1	307	2.5	0	0	125.35	20.1115	207.854	353.316
1002	1	307	2.5	10	10	147.027	48.3775	198.38	393.784
1002	1	307	2.5	20	20	155.417	74.3137	203.443	433.174
1002	1	307	2.5	30	30	154.311	90.3353	210.144	454.79
1002	1	307	2.5	40	40	146.524	131.096	216.252	493.873
1002	2	307	2.5	50	50	139.931	267.202	219.372	626.505
1002	3	307	2.5	60	60	133.197	206.146	206.257	545.601
1002	3	307	2.5	70	70	*	*	*	*
1002	3	307	2.5	60.84	99	127.267	176.68	205.87	509.817
1005	1	307	14	0	0	84.0366	87.5936	152.9	324.531
1005	3	307	14	10	10	107.892	181.523	139.905	429.319
1005	3	307	14	20	20	100.994	187.4	156.795	445.189
1005	3	307	14	30	30	*	*	*	*
1005	3	307	14	40	40	*	*	*	*
1005	3	307	14	50	50	*	*	*	*
1005	3	307	14	60	60	*	*	*	*
1005	3	307	14	70	70	*	*	*	*
1005	3	307	14	22.14	99	96.6474	93.4653	160.63	350.742
1007	1	410	15	0	0	62.5298	38.6546	108.33	209.515
1007	2	410	15	10	10	78.385	88.6408	104.417	271.443
1007	3	410	15	20	20	82.1925	166.377	102.301	350.87
1007	3	410	15	30	30	*	*	*	*
1007	3	410	15	40	40	*	*	*	*
1007	3	410	15	50	50	*	*	*	*
1007	3	410	15	60	60	*	*	*	*
1007	3	410	15	70	70	*	*	*	*
1007	3	410	15	27.63	99	86.0504	92.845	102.529	281.425
1009	1	309	16	0	0	63.3435	42.257	139.957	245.557
1009	2	309	16	10	10	93.5056	96.5903	128.013	318.109
1009	3	309	16	20	20	84.6434	173.642	127.401	385.687
1009	3	309	16	30	30	*	*	*	*
1009	3	309	16	40	40	*	*	*	*
1009	3	309	16	50	50	*	*	*	*
1009	3	309	16	60	60	*	*	*	*
1009	3	309	16	70	70	*	*	*	*
1009	3	309	16	24.85	99	81.1469	121.968	129.575	332.69

## Sheet: upper cheek teeth
zahnid	status	zp	za	kr	lok	ps	pz	isd	izd	ism	izm	idz	id	ges	s_ges	dz_sb	i_zb	infun
106	1	109	20	0	0	116.635	48.9911	*	*	*	*	532.837	*	698.462	116.635	532.837	*	*
106	2	109	20	10	10	123.224	110.845	10.012	*	*	*	499.566	*	743.648	133.236	509.578	*	10.012
106	3	109	20	20	20	111.787	146.973	18.3363	*	*	*	463.122	*	740.218	130.123	481.459	*	18.3363
106	3	109	20	30	30	*	*	*	*	*	*	*	*	*	*	*	*	*
106	3	109	20	40	40	*	*	*	*	*	*	*	*	*	*	*	*	*
106	3	109	20	50	50	*	*	*	*	*	*	*	*	*	*	*	*	*
106	3	109	20	60	60	*	*	*	*	*	*	*	*	*	*	*	*	*
106	3	109	20	70	70	*	*	*	*	*	*	*	*	*	*	*	*	*
106	3	109	20	80	80	*	*	*	*	*	*	*	*	*	*	*	*	*
106	3	109	20	21.98	99	108.835	152.897	20.3401	*	*	*	464.158	*	746.23	129.175	484.498	*	20.3401
108	1	210	20	0	0	61.0203	23.9845	*	*	*	*	452.014	*	537.019	61.0203	452.014	*	*
108	2	210	20	10	10	125.705	89.873	15.6333	37.5939	12.7016	24.2602	*	346.844	652.611	154.04	437.033	61.8541	90.189
108	3	210	20	20	20	118.961	129.545	24.509	37.1837	21.8799	36.3634	*	312.404	680.845	165.35	432.34	73.5471	119.936
108	3	210	20	30	30	*	*	*	*	*	*	*	*	*	*	*	*	*
108	3	210	20	40	40	*	*	*	*	*	*	*	*	*	*	*	*	*
108	3	210	20	50	50	*	*	*	*	*	*	*	*	*	*	*	*	*
108	3	210	20	60	60	*	*	*	*	*	*	*	*	*	*	*	*	*
108	3	210	20	70	70	*	*	*	*	*	*	*	*	*	*	*	*	*
108	3	210	20	80	80	*	*	*	*	*	*	*	*	*	*	*	*	*
108	3	210	20	45.34	99	118.665	129.39	24.8654	36.4844	21.342	37.372	*	312.249	680.368	164.872	432.313	73.8564	120.064
112	1	209	13	0	0	72.8882	18.0741	*	*	*	*	450.743	*	541.706	72.8882	450.743	*	*
112	1	209	13	10	10	107.026	85.9058	9.05723	20.6225	*	*	411.085	*	633.697	116.083	440.765	20.6225	29.6797
112	2	209	13	20	20	103.543	173.963	25.8538	27.6693	12.3385	*	375.038	*	718.406	141.735	440.899	27.6693	65.8616
112	3	209	13	30	30	*	*	*	*	*	*	*	*	*	*	*	*	*
112	3	209	13	40	40	*	*	*	*	*	*	*	*	*	*	*	*	*
112	3	209	13	50	50	*	*	*	*	*	*	*	*	*	*	*	*	*
112	3	209	13	60	60	*	*	*	*	*	*	*	*	*	*	*	*	*
112	3	209	13	70	70	*	*	*	*	*	*	*	*	*	*	*	*	*
112	3	209	13	80	80	*	*	*	*	*	*	*	*	*	*	*	*	*
112	3	209	13	29.35	99	104.787	152.117	25.2822	35.8927	24.4619	26.311	*	342.117	710.969	154.531	454.065	62.2037	111.948
124	1	108	1	0	0	94.4319	23.8971	*	*	*	*	468.111	*	586.44	94.4319	468.111	*	*
124	1	108	1	10	10	101.142	40.4785	14.3356	37.0627	15.8148	63.2191	*	359.855	631.908	131.293	490.287	100.282	130.432
124	1	108	1	20	20	97.2425	43.5917	18.101	67.6905	21.0125	51.7479	*	332.038	631.424	136.356	490.59	119.438	158.552
124	1	108	1	30	30	103.072	45.461	21.342	55.3049	19.8156	50.699	*	336.489	632.184	144.23	483.651	106.004	147.161
124	1	108	1	40	40	97.5182	65.169	20.0577	54.5989	24.1862	58.6333	*	339.219	659.382	141.762	496.695	113.232	157.476
124	3	108	1	50	50	109.447	127.258	23.0432	57.2616	29.0141	58.7476	*	347.308	752.079	161.504	515.374	116.009	168.066
124	3	108	1	60	60	*	*	*	*	*	*	*	*	*	*	*	*	*
124	3	108	1	70	70	*	*	*	*	*	*	*	*	*	*	*	*	*
124	3	108	1	80	80	*	*	*	*	*	*	*	*	*	*	*	*	*
124	3	108	1	51.46	99	112.862	143.86	28.4022	55.1906	29.2292	61.3094	*	344.565	775.419	170.494	518.696	116.5	174.131
125	1	109	3	0	0	101.075	10.6844	*	*	*	*	465.866	*	577.625	101.075	465.866	*	*
125	1	109	3	10	10	115.538	39.8263	19.3181	57.47	18.6457	42.099	*	338.002	630.9	153.502	475.535	99.569	137.533
125	1	109	3	20	20	93.1005	51.3108	19.5265	62.3315	23.2919	87.6675	*	293.415	630.644	135.919	486.233	149.999	192.817
125	1	109	3	30	30	93.3762	51.0957	20.6225	56.4211	22.6532	77.7026	*	312.168	634.04	136.652	489.568	134.124	177.399
125	1	109	3	40	40	95.3127	65.8145	18.3834	60.1731	22.9826	65.3976	*	332.656	660.72	136.679	499.593	125.571	166.937
125	1	109	3	50	50	96.0456	81.8445	22.0144	60.0722	25.2217	67.1526	*	347.51	699.861	143.282	521.971	127.225	174.461
125	3	109	3	60	60	109.285	150.355	26.6741	64.463	27.0708	80.1366	*	335.097	793.082	163.03	533.442	144.6	198.345
125	3	109	3	70	70	*	*	*	*	*	*	*	*	*	*	*	*	*
125	3	109	3	80	80	*	*	*	*	*	*	*	*	*	*	*	*	*
125	3	109	3	62.49	99	116.164	137.513	23.07	67.435	33.1964	79.6256	*	330.034	787.038	172.43	533.361	147.061	203.327
665	1	107	5	0	0	*	*	*	*	*	*	*	*	*	*	*	*	*
665	1	107	5	10	10	*	*	*	*	*	*	*	*	*	*	*	*	*
665	1	107	5	20	20	118.168	38.0175	26.9498	40.9626	29.4982	41.0567	*	331.809	626.462	174.616	470.277	82.0194	138.467
665	1	107	5	30	30	108.693	58.7409	31.5692	42.7176	33.4183	43.9212	*	338.701	657.762	173.681	490.328	86.6387	151.626
665	2	107	5	40	40	113.246	146.267	32.7929	53.0658	32.9678	54.3434	*	342.11	774.793	179.006	515.28	107.409	173.17
665	3	107	5	50	50	*	*	*	*	*	*	*	*	*	*	*	*	*
665	3	107	5	60	60	*	*	*	*	*	*	*	*	*	*	*	*	*
665	3	107	5	70	70	*	*	*	*	*	*	*	*	*	*	*	*	*
665	3	107	5	80	80	*	*	*	*	*	*	*	*	*	*	*	*	*
665	3	107	5	49.44	99	105.937	185.482	34.205	57.7592	35.5229	55.5806	*	354.146	828.632	175.665	537.214	113.34	183.068
676	1	109	15	0	0	78.6708	17.6438	*	*	*	*	420.337	*	516.652	78.6708	420.337	*	*
676	1	109	15	10	10	89.2073	38.5689	23.5743	34.0772	21.6177	28.1736	*	278.387	513.606	134.399	385.83	62.2508	107.443
676	1	109	15	20	20	90.6462	52.7498	23.2516	39.5035	25.726	36.1684	*	278.643	546.688	139.624	403.292	75.6719	124.65
676	1	109	15	30	30	88.0373	84.6686	24.825	44.5801	24.4888	45.9048	*	287.538	600.043	137.351	427.337	90.4849	139.799
676	3	109	15	40	40	88.4072	180.19	23.5138	50.941	25.6386	55.7218	*	286.678	711.09	137.56	442.493	106.663	155.815
676	3	109	15	50	50	*	*	*	*	*	*	*	*	*	*	*	*	*
676	3	109	15	60	60	*	*	*	*	*	*	*	*	*	*	*	*	*
676	3	109	15	70	70	*	*	*	*	*	*	*	*	*	*	*	*	*
676	3	109	15	80	80	*	*	*	*	*	*	*	*	*	*	*	*	*
676	3	109	15	47.15	99	95.2925	183.169	24.7712	57.3625	31.9928	57.8667	*	284.365	734.819	152.057	456.358	115.229	171.993
677	1	109	12	0	0	83.5322	20.246	*	*	*	*	*	332.145	435.924	83.5322	332.145	*	*
677	1	109	12	10	10	96.3818	122.74	19.7618	24.0854	16.0704	19.5668	*	261.806	560.412	132.214	341.29	43.6522	79.4844
677	2	109	12	20	20	83.6533	107.241	22.0547	27.017	21.0125	24.1123	*	255.223	540.314	126.721	349.419	51.1293	94.1965
677	3	109	12	30	30	*	*	*	*	*	*	*	*	*	*	*	*	*
677	3	109	12	40	40	*	*	*	*	*	*	*	*	*	*	*	*	*
677	3	109	12	50	50	*	*	*	*	*	*	*	*	*	*	*	*	*
677	3	109	12	60	60	*	*	*	*	*	*	*	*	*	*	*	*	*
677	3	109	12	70	70	*	*	*	*	*	*	*	*	*	*	*	*	*
677	3	109	12	80	80	*	*	*	*	*	*	*	*	*	*	*	*	*
677	3	109	12	28.12	99	88.3534	58.2298	12.742	18.8944	8.12932	10.7382	*	285.992	483.079	109.225	336.496	29.6327	50.504
682	1	107	8	0	0	116.211	23.0499	*	*	*	*	428.816	*	568.077	116.211	428.816	*	*
682	1	107	8	10	10	129.524	33.0417	28.8594	34.4134	27.9449	58.8686	*	333.134	645.786	186.329	483.22	93.2821	150.086
682	1	107	8	20	20	130.056	35.0926	30.3252	44.4322	35.9465	44.5667	*	338.405	658.824	196.327	493.676	88.9989	155.271
682	2	107	8	30	30	139.812	63.0442	34.0571	44.9432	30.9102	47.653	*	352.808	713.228	204.779	510.372	92.5962	157.563
682	3	107	8	40	40	125.624	155.896	31.8516	46.7452	37.6746	46.8865	*	376.127	820.805	195.151	539.285	93.6317	163.158
682	3	107	8	50	50	*	*	*	*	*	*	*	*	*	*	*	*	*
682	3	107	8	60	60	*	*	*	*	*	*	*	*	*	*	*	*	*
682	3	107	8	70	70	*	*	*	*	*	*	*	*	*	*	*	*	*
682	3	107	8	80	80	*	*	*	*	*	*	*	*	*	*	*	*	*
682	3	107	8	47.97	99	123.849	154.726	38.8849	48.6145	34.8236	54.8006	*	381.432	837.131	197.558	558.556	103.415	177.124
689	1	107	13	0	0	126.633	57.8264	9.73635	11.2627	18.0607	19.1567	*	389.864	632.54	154.43	448.081	30.4194	58.2164
689	2	107	13	10	10	140.162	165.713	23.2314	24.9595	28.3417	35.1396	*	352.284	769.831	191.735	463.956	60.0991	111.672
689	3	107	13	20	20	126.371	201.471	30.0428	36.8879	31.1456	43.4236	*	347.1	816.442	187.559	488.599	80.3115	141.5
689	3	107	13	30	30	*	*	*	*	*	*	*	*	*	*	*	*	*
689	3	107	13	40	40	*	*	*	*	*	*	*	*	*	*	*	*	*
689	3	107	13	50	50	*	*	*	*	*	*	*	*	*	*	*	*	*
689	3	107	13	60	60	*	*	*	*	*	*	*	*	*	*	*	*	*
689	3	107	13	70	70	*	*	*	*	*	*	*	*	*	*	*	*	*
689	3	107	13	80	80	*	*	*	*	*	*	*	*	*	*	*	*	*
689	3	107	13	24.44	99	122.262	142.313	30.2244	39.7321	30.2916	47.4042	*	349.695	761.923	182.778	497.347	87.1363	147.652
697	1	109	9	0	0	70.333	15.0012	*	*	*	*	341.613	*	426.947	70.333	341.613	*	*
697	1	109	9	10	10	99.0983	65.4581	20.0846	18.8743	14.7995	11.5989	*	269.39	499.304	133.982	334.748	30.4732	65.3573
697	1	109	9	20	20	103.429	102.501	24.3476	32.6114	20.3737	25.9681	*	244.142	553.372	148.15	347.443	58.5795	103.301
697	2	109	9	30	30	104.585	133.216	24.3005	35.301	24.7578	30.0361	*	236.685	588.881	153.643	351.08	65.3371	114.395
697	3	109	9	40	40	86.6656	121.59	22.8078	36.6458	27.212	34.7295	*	237.229	566.88	136.685	358.625	71.3753	121.395
697	3	109	9	50	50	*	*	*	*	*	*	*	*	*	*	*	*	*
697	3	109	9	60	60	*	*	*	*	*	*	*	*	*	*	*	*	*
697	3	109	9	70	70	*	*	*	*	*	*	*	*	*	*	*	*	*
697	3	109	9	80	80	*	*	*	*	*	*	*	*	*	*	*	*	*
697	3	109	9	41.49	99	87.022	110.052	24.5762	36.1415	28.2139	35.8994	*	233.881	555.786	139.812	358.712	72.0409	124.831
936	1	107	12	0	0	108.552	41.0702	*	*	*	*	388.17	*	537.792	108.552	388.17	0	0
936	2	107	12	10	10	120.655	132.779	22.8549	27.7634	27.0439	30.6951	*	293.967	655.758	170.554	402.324	58.4585	108.357
936	3	107	12	20	20	102.131	177.043	21.5034	35.57	24.0249	36.0944	*	300.267	696.633	147.659	417.46	71.6644	117.193
936	3	107	12	30	30	*	*	*	*	*	*	*	*	*	*	*	*	*
936	3	107	12	40	40	*	*	*	*	*	*	*	*	*	*	*	*	*
936	3	107	12	50	50	*	*	*	*	*	*	*	*	*	*	*	*	*
936	3	107	12	60	60	*	*	*	*	*	*	*	*	*	*	*	*	*
936	3	107	12	70	70	*	*	*	*	*	*	*	*	*	*	*	*	*
936	3	107	12	80	80	*	*	*	*	*	*	*	*	*	*	*	*	*
936	3	107	12	21.91	99	92.724	149.353	25.3965	35.2539	27.3532	32.9409	*	298.741	661.763	145.474	419.685	68.1948	120.945
937	1	208	11	0	0	90.31	31.8718	*	*	*	*	411.226	*	533.408	90.31	411.226	*	0
937	2	208	11	10	10	117.488	76.1022	20.9856	24.7376	24.0921	33.6805	*	316.573	613.659	162.566	420.068	58.4181	103.496
937	3	208	11	20	20	117.334	181.756	24.1929	30.8295	24.1795	36.8004	*	303.945	719.038	165.706	419.947	67.63	116.002
937	3	208	11	30	30	*	*	*	*	*	*	*	*	*	*	*	*	*
937	3	208	11	40	40	*	*	*	*	*	*	*	*	*	*	*	*	*
937	3	208	11	50	50	*	*	*	*	*	*	*	*	*	*	*	*	*
937	3	208	11	60	60	*	*	*	*	*	*	*	*	*	*	*	*	*
937	3	208	11	70	70	*	*	*	*	*	*	*	*	*	*	*	*	*
937	3	208	11	80	80	*	*	*	*	*	*	*	*	*	*	*	*	*
937	3	208	11	27.56	99	107.94	185.515	25.141	33.8957	31.233	33.5998	*	311.698	729.023	164.314	435.567	67.4955	123.87
940	1	110	3.5	0	0	94.7681	24.1593	*	*	*	*	412.101	*	531.028	94.7681	412.101	*	*
940	1	110	3.5	10	10	119.512	30.3454	27.7096	44.7281	23.7021	70.4272	*	277.977	594.402	170.924	444.544	115.155	166.567
940	1	110	3.5	20	20	119.963	33.9697	24.3207	47.8749	27.2994	44.3784	*	274.911	572.717	171.583	418.784	92.2533	143.873
940	1	110	3.5	30	30	105.997	42.5831	26.6674	39.9473	28.7451	41.1374	*	273.855	558.933	161.41	410.352	81.0847	136.497
940	1	110	3.5	40	40	107.12	43.9682	21.3756	40.2028	27.7365	43.0067	*	273.687	557.097	156.232	406.009	83.2095	132.322
940	2	110	3.5	50	50	96.7718	67.24	22.3371	42.926	29.1216	45.3937	*	281.964	585.755	148.231	421.743	88.3198	139.779
940	3	110	3.5	60	60	110.98	138.75	28.1399	46.4225	29.9756	55.0965	*	270.318	679.682	169.095	429.953	101.519	159.635
940	3	110	3.5	70	70	*	*	*	*	*	*	*	*	*	*	*	*	*
940	3	110	3.5	80	80	*	*	*	*	*	*	*	*	*	*	*	*	*
940	3	110	3.5	62.4	99	95.1581	125.88	31.0044	44.6339	32.2685	56.5085	*	271.414	656.868	158.431	435.83	101.142	164.415
941	1	209	4.5	0	0	101.694	24.1795	*	*	*	*	418.919	*	544.792	101.694	418.919	0	0
941	1	209	4.5	10	10	107.887	32.8871	19.4458	45.4139	*	*	374.971	*	580.604	127.332	439.83	45.4139	64.8597
941	1	209	4.5	20	20	97.5585	38.9387	26.19	36.6525	20.9385	38.9454	*	302.177	561.4	144.687	424.903	75.5979	122.726
941	1	209	4.5	30	30	107.947	36.9484	24.0786	38.5823	22.6397	38.9858	*	291.264	560.445	154.665	415.55	77.5681	124.286
941	2	209	4.5	40	40	107.228	58.5459	24.7443	39.8397	23.1911	39.6716	*	286.879	580.1	155.163	414.326	79.5113	127.447
941	3	209	4.5	50	50	93.0938	186.658	25.5647	45.7434	28.1399	44.4188	*	288.608	712.226	146.798	432.474	90.1621	143.867
941	3	209	4.5	60	60	*	*	*	*	*	*	*	*	*	*	*	*	*
941	3	209	4.5	70	70	*	*	*	*	*	*	*	*	*	*	*	*	*
941	3	209	4.5	80	80	*	*	*	*	*	*	*	*	*	*	*	*	*
941	3	209	4.5	54.36	99	97.5182	179.84	25.7395	45.9653	31.9861	49.065	*	283.585	713.699	155.244	436.341	95.0303	152.756
990	1	210	13	0	0	80.8813	23.5626	*	*	*	*	396.6	*	501.044	80.8813	396.6	0	0
990	1	210	13	10	10	109.539	57.1523	18.0808	50.3745	7.01818	24.746	*	317.41	584.321	134.638	417.629	75.1205	100.22
990	2	210	13	20	20	102.803	151.056	21.5471	40.5609	22.5288	60.7194	*	267.111	666.327	146.879	412.467	101.28	145.356
990	3	210	13	30	30	*	*	*	*	*	*	*	*	*	*	*	*	*
990	3	210	13	40	40	*	*	*	*	*	*	*	*	*	*	*	*	*
990	3	210	13	50	50	*	*	*	*	*	*	*	*	*	*	*	*	*
990	3	210	13	60	60	*	*	*	*	*	*	*	*	*	*	*	*	*
990	3	210	13	70	70	*	*	*	*	*	*	*	*	*	*	*	*	*
990	3	210	13	80	80	*	*	*	*	*	*	*	*	*	*	*	*	*
990	3	210	13	27.46	99	102.988	179.1	21.2008	37.9519	22.9019	51.4924	*	273.657	689.292	147.091	407.204	89.4443	133.547
1001	1	207	2.5	0	0	122.457	27.1044	26.2135	23.492	32.092	39.7321	*	393.616	664.708	180.763	515.146	63.2241	121.53
1001	1	207	2.5	10	10	133.15	32.3962	27.6087	40.2936	30.2008	43.3866	*	361.913	668.949	190.96	503.402	83.6802	141.49
1001	1	207	2.5	20	20	110.351	44.6406	29.6243	43.3883	31.3893	49.5643	*	344.736	653.694	171.365	498.702	92.9526	153.966
1001	1	207	2.5	30	30	114.406	49.9963	29.826	47.9388	35.9869	48.6784	*	329.523	656.355	180.218	491.953	96.6172	162.43
1001	2	207	2.5	40	40	115.177	131.258	30.806	54.1517	32.9325	55.0511	*	328.409	747.785	178.916	501.35	109.203	172.941
1001	3	207	2.5	50	50	104.619	206.035	32.171	53.6794	36.0944	52.6825	*	325.927	811.209	172.884	500.555	106.362	174.627
1001	3	207	2.5	60	60	*	*	*	*	*	*	*	*	*	*	*	*	*
1001	3	207	2.5	70	70	*	*	*	*	*	*	*	*	*	*	*	*	*
1001	3	207	2.5	80	80	*	*	*	*	*	*	*	*	*	*	*	*	*
1001	3	207	2.5	53.57	99	99.4295	163.545	31.0716	55.004	34.1478	54.2761	*	312.227	749.701	164.649	486.727	109.28	174.5
1004	1	207	14	0	0	75.3979	43.906	*	*	*	*	353.55	*	472.854	75.3979	353.55	*	*
1004	2	207	14	10	10	88.155	116.303	18.3969	25.8723	20.0526	28.2559	*	281.847	578.883	126.605	374.424	54.1282	92.5777
1004	3	207	14	20	20	81.0074	167.776	22.7658	36.7299	22.8515	42.2318	*	262.305	635.667	126.625	386.884	78.9616	124.579
1004	3	207	14	30	30	*	*	*	*	*	*	*	*	*	*	*	*	*
1004	3	207	14	40	40	*	*	*	*	*	*	*	*	*	*	*	*	*
1004	3	207	14	50	50	*	*	*	*	*	*	*	*	*	*	*	*	*
1004	3	207	14	60	60	*	*	*	*	*	*	*	*	*	*	*	*	*
1004	3	207	14	70	70	*	*	*	*	*	*	*	*	*	*	*	*	*
1004	3	207	14	80	80	*	*	*	*	*	*	*	*	*	*	*	*	*
1004	3	207	14	25.99	99	80.7418	134.895	24.0366	43.6791	21.542	42.6806	*	268.393	615.969	126.32	400.332	86.3597	131.938
1006	1	110	15	0	0	70.4188	25.2167	*	*	*	*	268.829	*	364.464	70.4188	268.829	*	*
1006	1	110	15	10	10	80.4039	70.5516	15.1408	18.4977	12.5873	25.8185	*	217.864	440.864	108.132	289.909	44.3162	72.0443
1006	3	110	15	20	20	86.6202	128.094	16.3309	28.2307	18.3347	30.5354	*	221.124	529.27	121.286	314.555	58.7661	93.4317
1006	3	110	15	30	30	*	*	*	*	*	*	*	*	*	*	*	*	*
1006	3	110	15	40	40	*	*	*	*	*	*	*	*	*	*	*	*	*
1006	3	110	15	50	50	*	*	*	*	*	*	*	*	*	*	*	*	*
1006	3	110	15	60	60	*	*	*	*	*	*	*	*	*	*	*	*	*
1006	3	110	15	70	70	*	*	*	*	*	*	*	*	*	*	*	*	*
1006	3	110	15	80	80	*	*	*	*	*	*	*	*	*	*	*	*	*
1006	3	110	15	29.23	99	74.5641	107.394	18.0691	36.4542	20.5687	37.6426	*	219.023	513.715	113.202	331.757	74.0968	112.735
1008	1	209	16	0	0	71.46	28.81	*	*	*	*	319.77	*	420.04	71.46	319.77	0	0
1008	2	209	16	10	10	80.02	111.53	14.34	21.32	10.23	18.66	*	*	256.1	104.59	64.55	39.98	64.55
1008	3	209	16	20	20	81.63	138.2	18.3	28.46	16.77	26.83	*	*	310.19	116.7	90.36	55.29	90.36
1008	3	209	16	30	30	*	*	*	*	*	*	*	*	*	*	*	*	*
1008	3	209	16	40	40	*	*	*	*	*	*	*	*	*	*	*	*	*
1008	3	209	16	50	50	*	*	*	*	*	*	*	*	*	*	*	*	*
1008	3	209	16	60	60	*	*	*	*	*	*	*	*	*	*	*	*	*
1008	3	209	16	70	70	*	*	*	*	*	*	*	*	*	*	*	*	*
1008	3	209	16	80	80	*	*	*	*	*	*	*	*	*	*	*	*	*
1008	3	209	16	27.39	99	72.58	96.99	20.48	32.99	20.38	31.53	*	*	274.95	113.44	105.38	64.52	105.38
